# Supplementary material
Source: PubMed Central journal article supplement (PMC3058345)

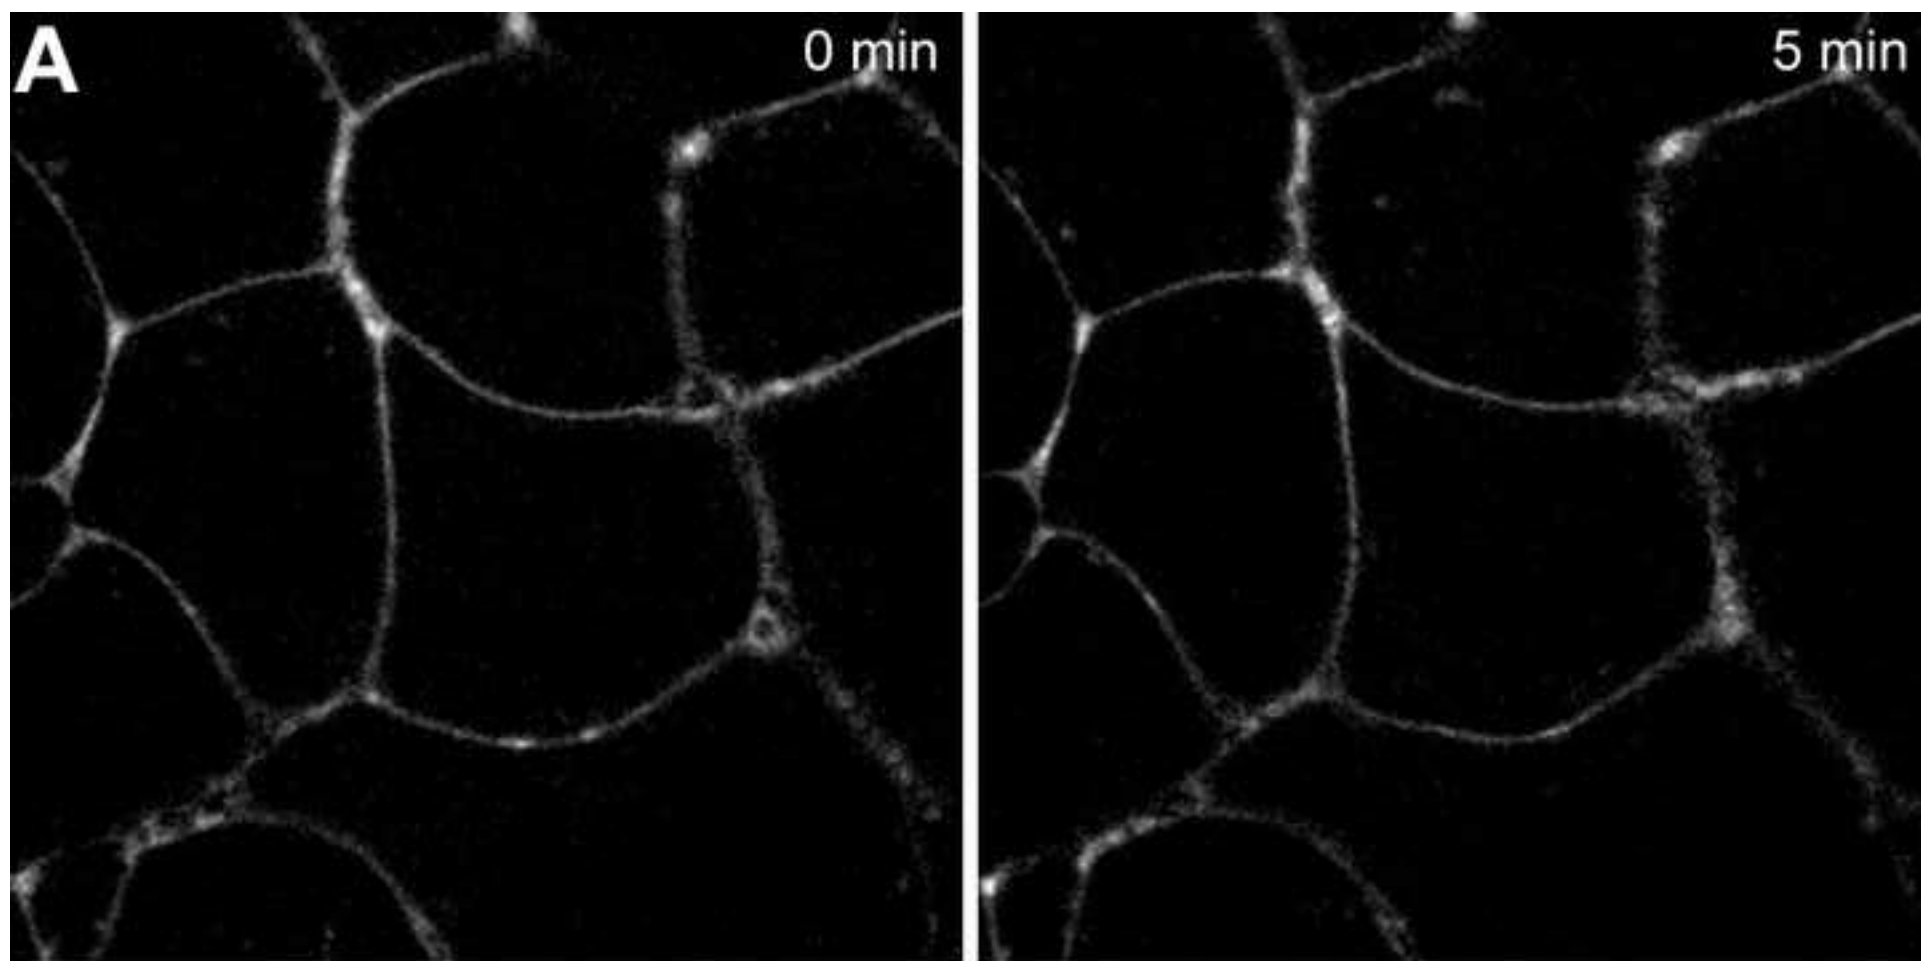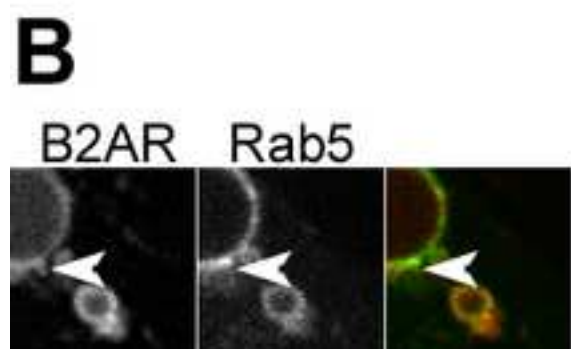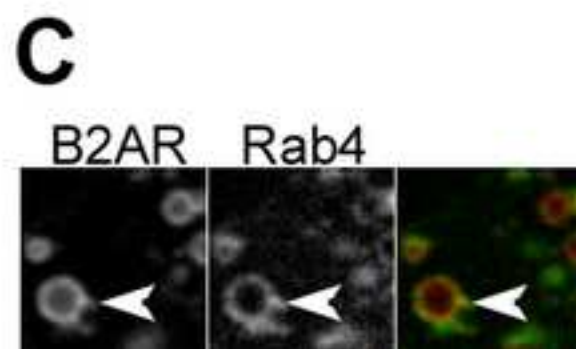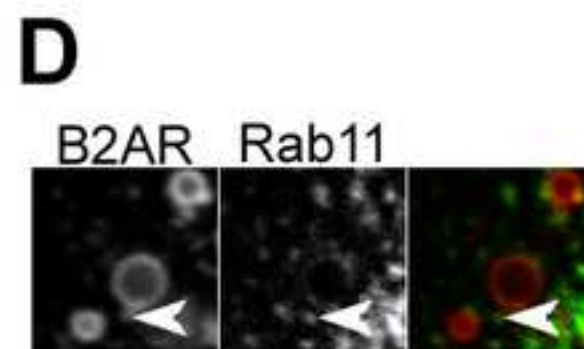

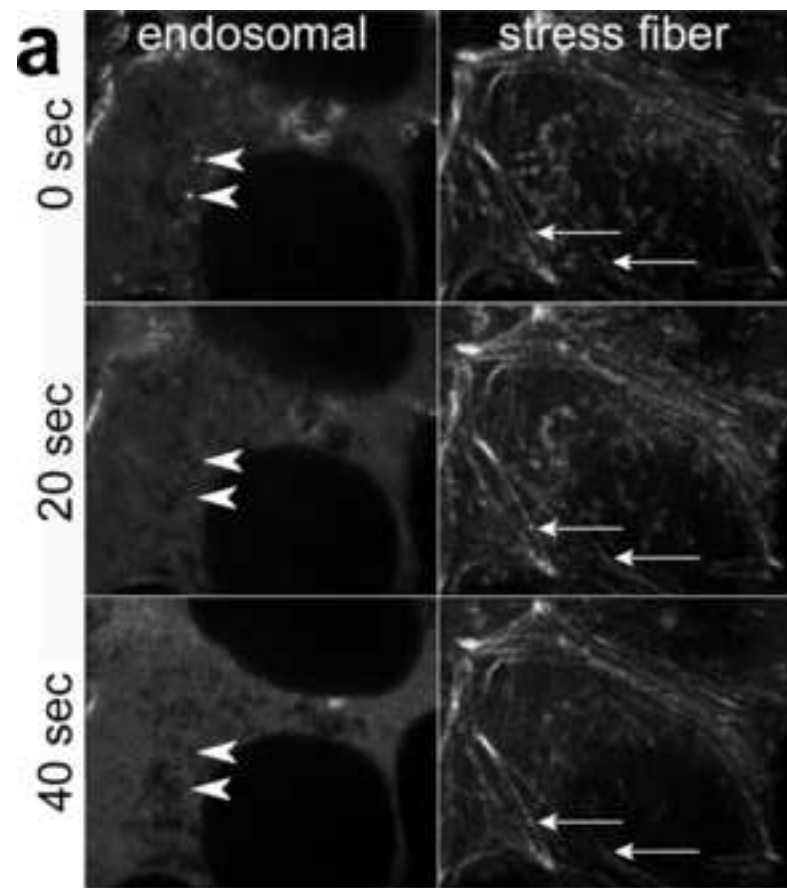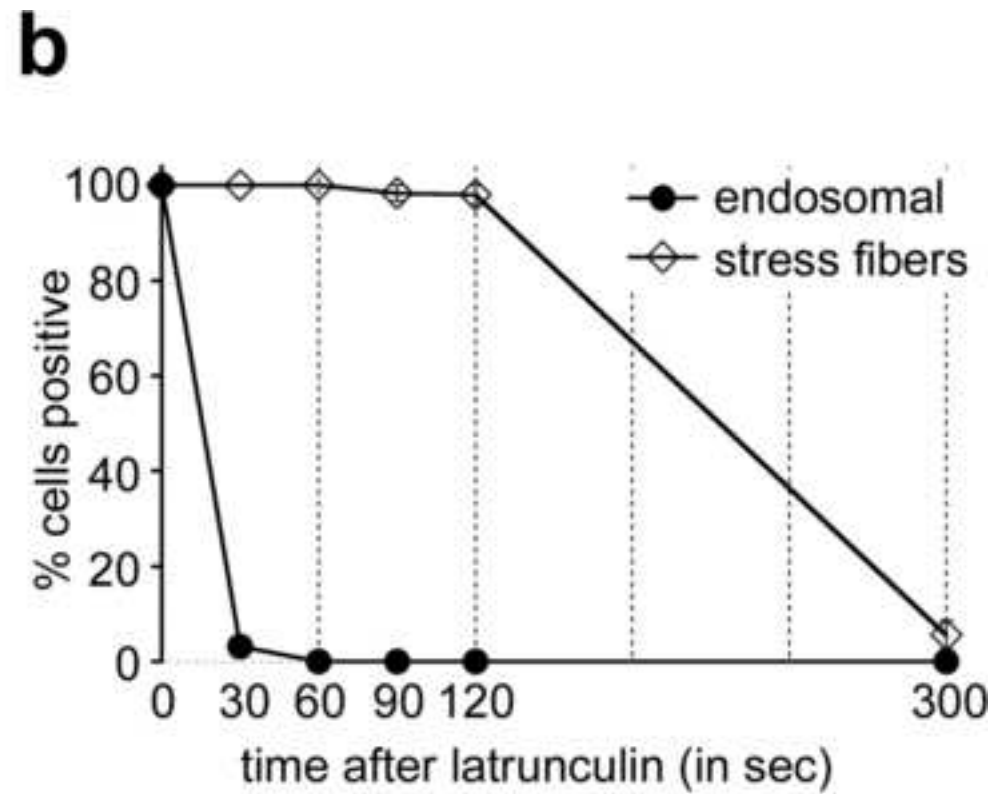

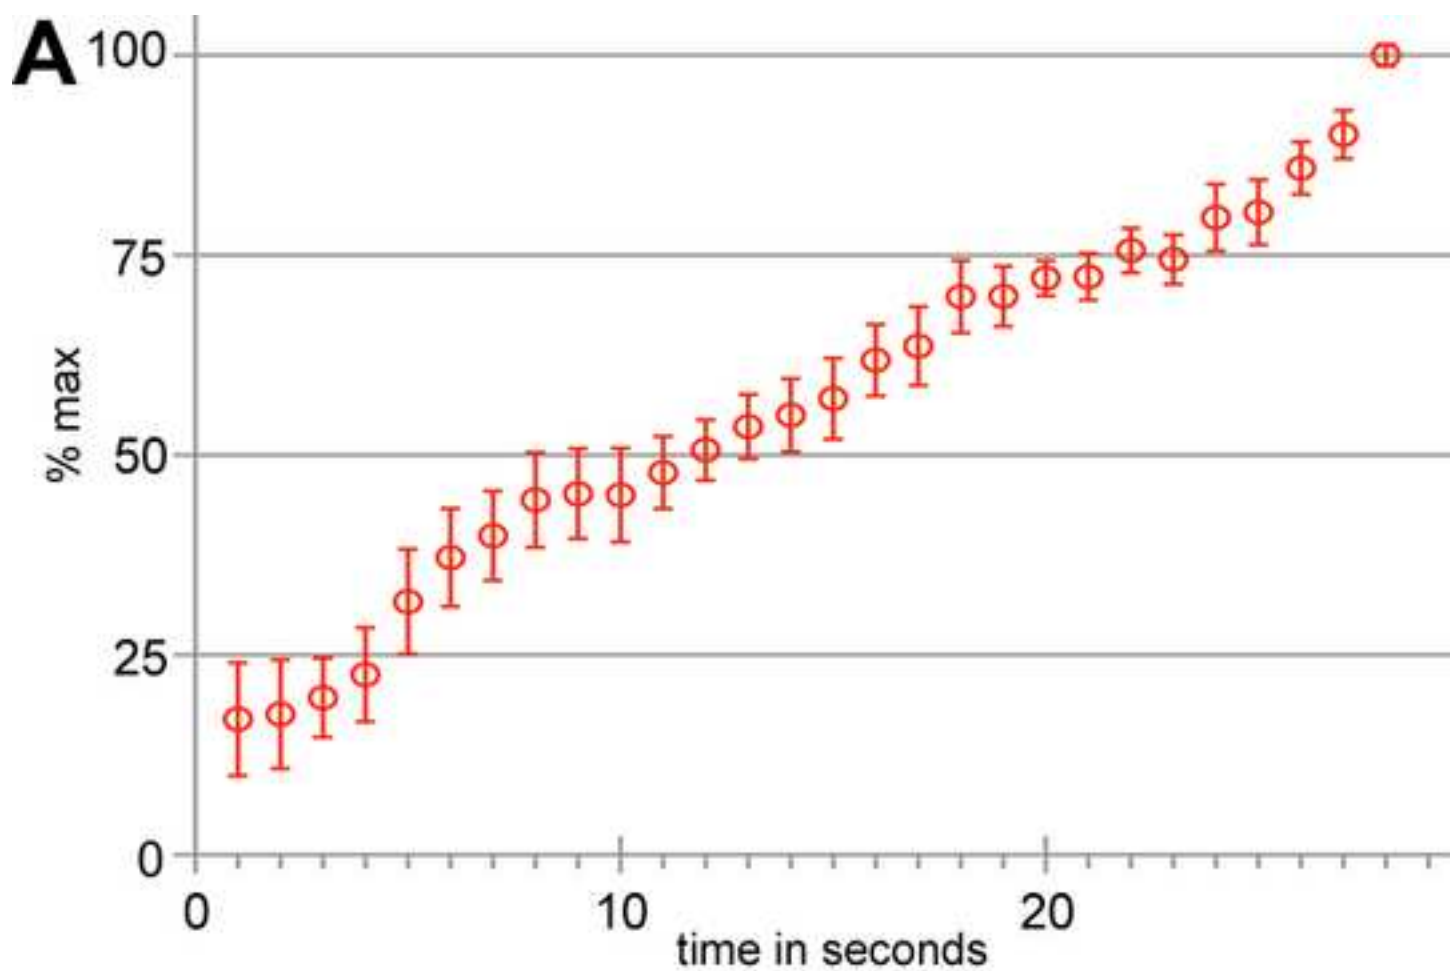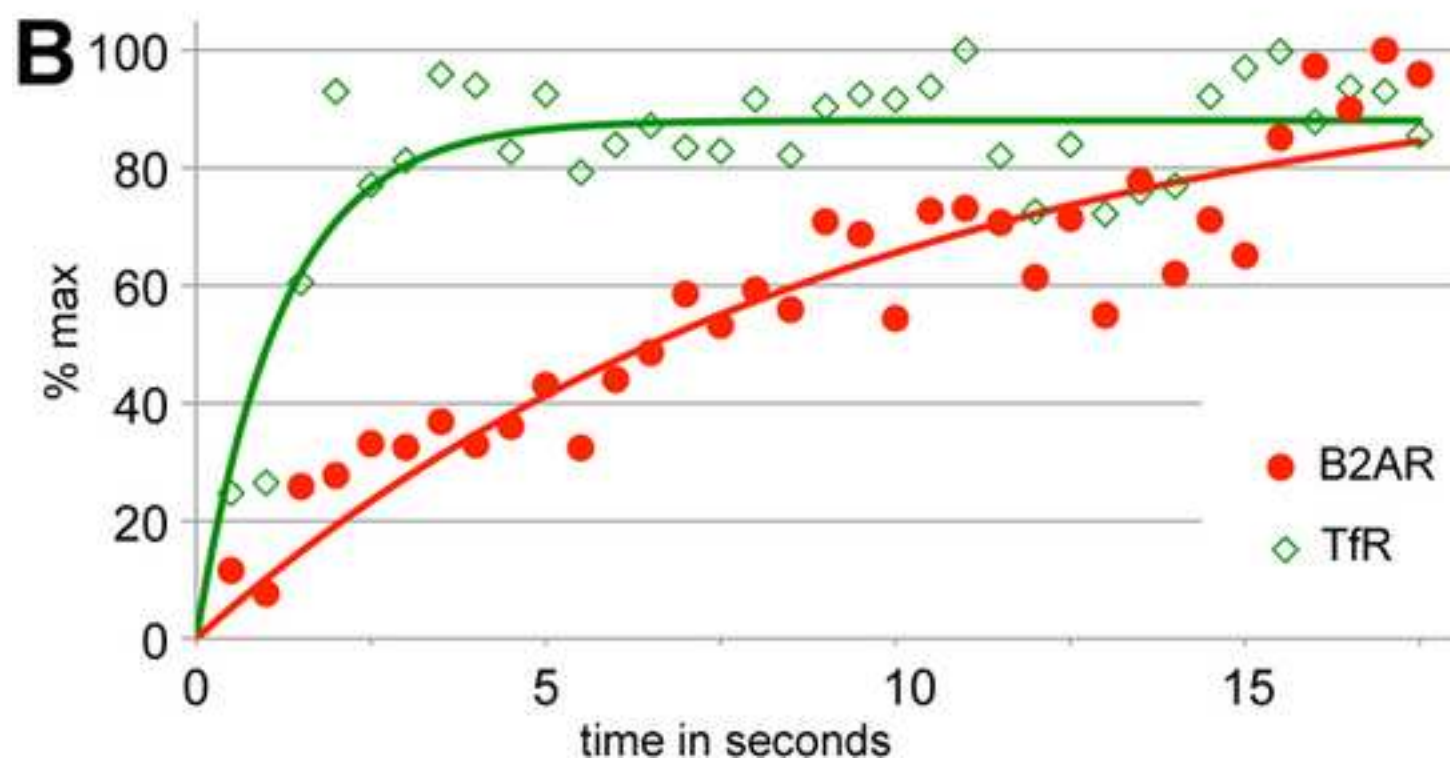

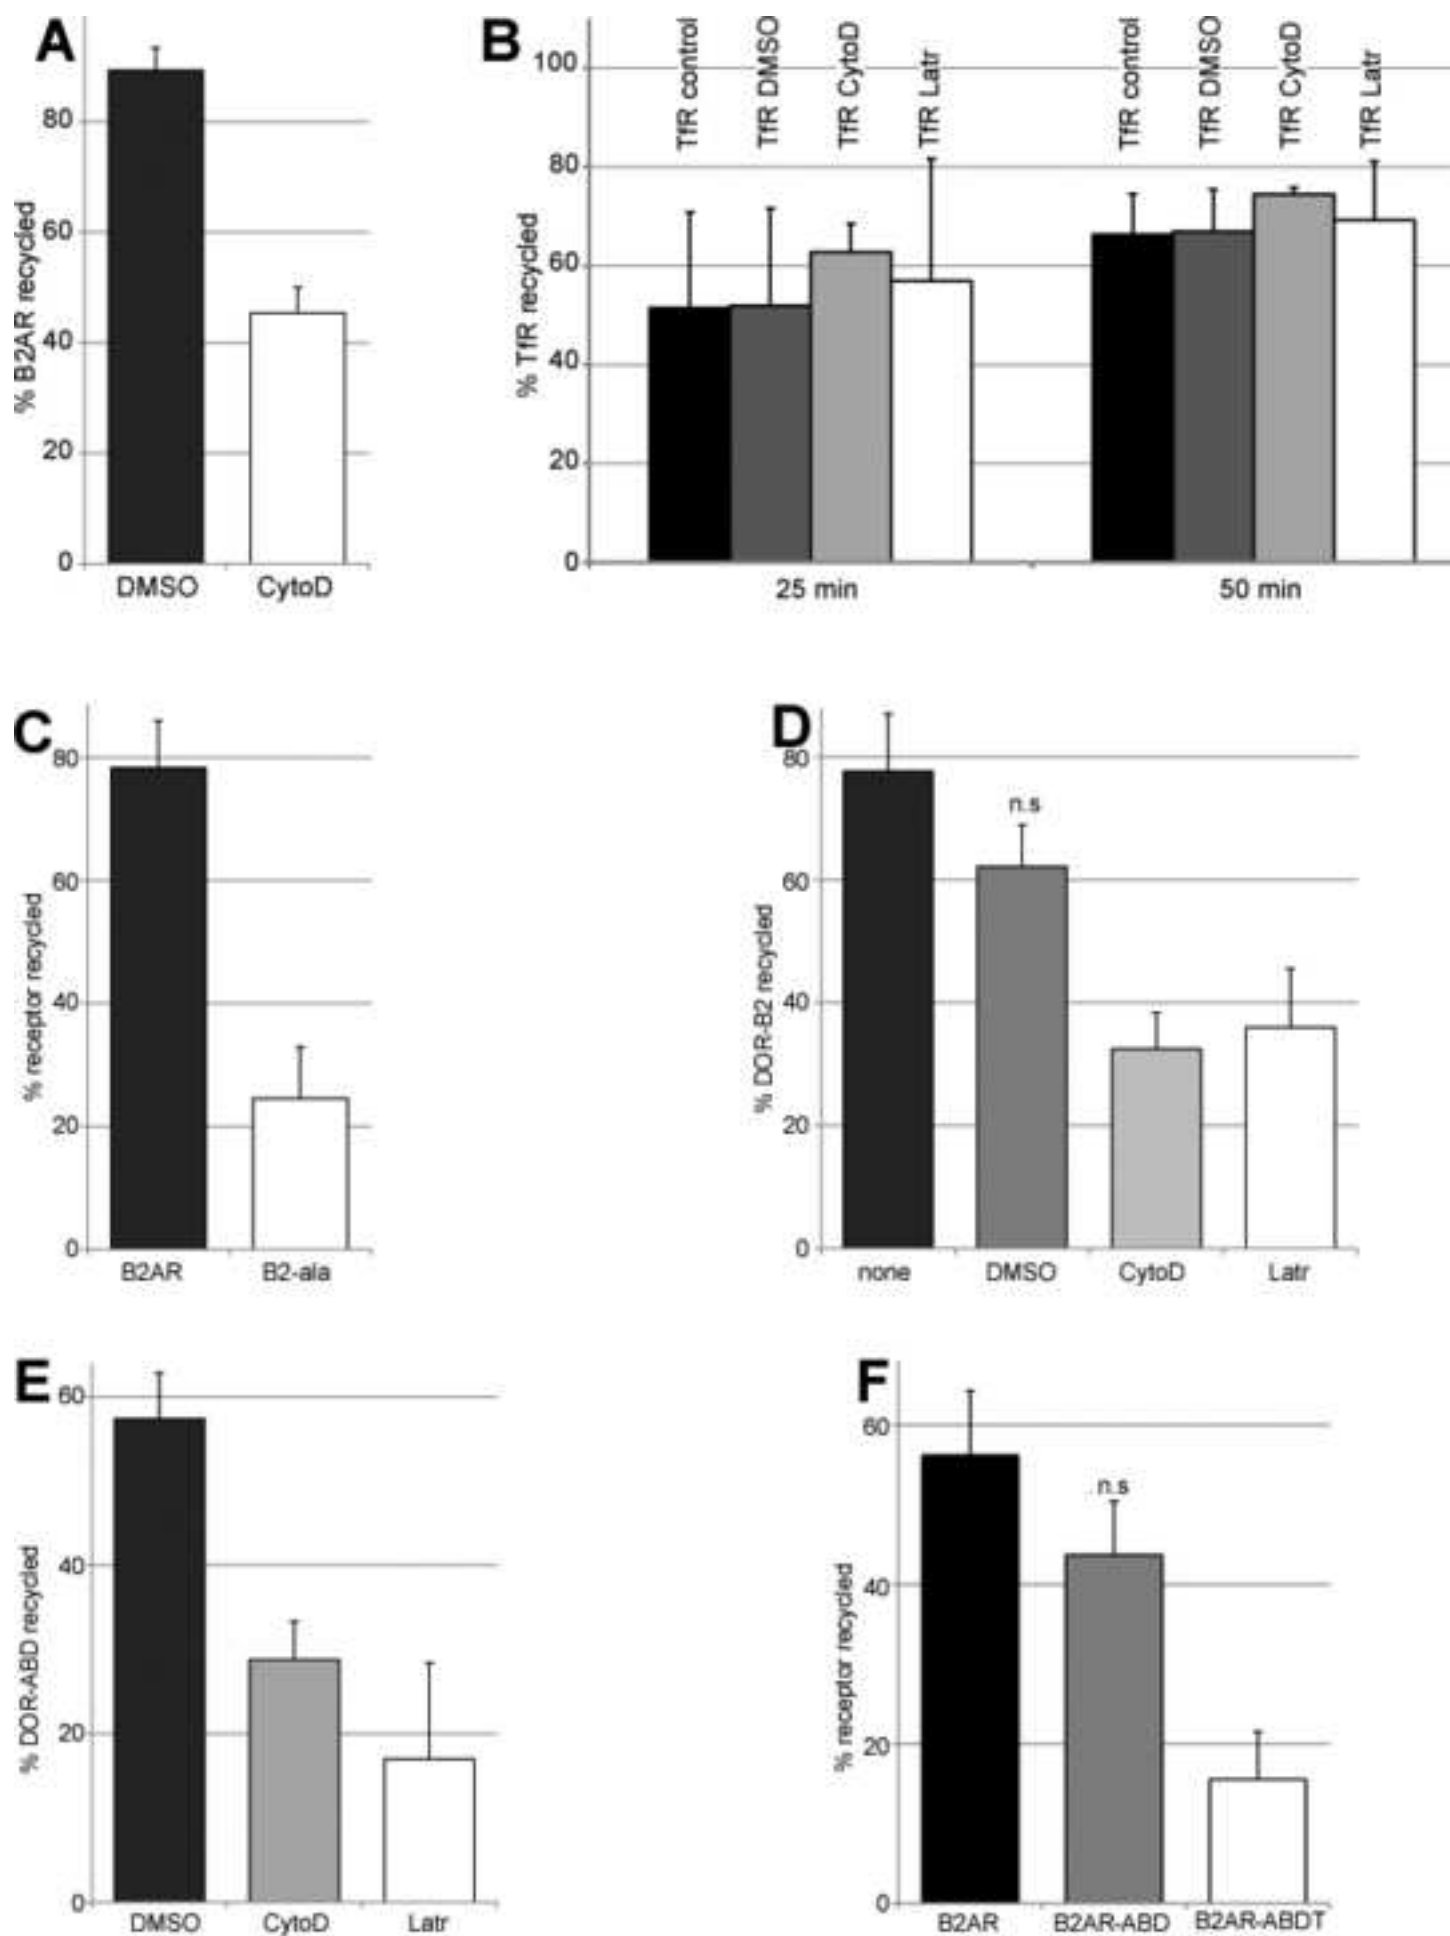

Supplement: NIHMS244039-supplement-03.pdf [file NIHMS244039-supplement-03.pdf]
